# Supplementary material
Source: Springer Nature journal article supplement (https://www.springermedizin.de/resource/supplementary/12911_2012_555_MOESM1_ESM.pdf/9526132)
Supplement: MOESM1 [file 9526132]

Admission Form - HUP [2 orders of 22 are selected]

ADMISSION ORDER:

| Admission Order                                        | Service | Diagnosis | House Officer | Beeper # | Condition | Attending MD |
|--------------------------------------------------------|---------|-----------|---------------|----------|-----------|--------------|
| <input checked="" type="checkbox"/> Admit To: [HUP]    | *       | *         |               | *        | *         |              |
| <input checked="" type="checkbox"/> Assessment Summary |         |           |               |          |           |              |

GIVE Pneumovax Vaccine For Patients:  
 [1] Age 65 yrs or older [2] Going to surgery [3] UNKNOWN VACCINATION HISTORY (Note: Rare incidence of fever, arm swelling or anaphylaxis may occur) [4] Hemophilac

GIVE Flu Vaccine For Patients:  
 [1] 50 yrs or older [2] Going to surgery [3] UNKNOWN VACCINATION HISTORY (Note: Rare incidence of fever, swelling or anaphylaxis may occur) [4] Mild Hemophilac (For moderate/severe hemophilia discuss with hematology & give factor infusion BEFORE vaccine)

ASSESSMENTS:

| PNEUMOVAX                                                  | INFLUENZA                                                      | PREGNANCY                                                   | LACTATION                                                   | SMOKING                                                           | MRSA                                                          |
|------------------------------------------------------------|----------------------------------------------------------------|-------------------------------------------------------------|-------------------------------------------------------------|-------------------------------------------------------------------|---------------------------------------------------------------|
| Administer Pneumovax Vaccine <input type="checkbox"/>      | Administer Influenza Vaccine <input type="checkbox"/>          | Patient is pregnant <input type="checkbox"/>                | Patient is Breast-Feeding <input type="checkbox"/>          | Patient has smoked in the last 12 months <input type="checkbox"/> | MRSA swab indicated on admission <input type="checkbox"/>     |
| Patient Refused Pneumovax Vaccine <input type="checkbox"/> | Patient refused influenza vaccine <input type="checkbox"/>     | Patient denies pregnancy <input type="checkbox"/>           | Patient is NOT Breast-Feeding <input type="checkbox"/>      | Non-Smoker <input type="checkbox"/>                               | MRSA Swab not indicated on admission <input type="checkbox"/> |
| Previous Adverse Reaction/Allergy <input type="checkbox"/> | Previous Adverse Reaction/Egg-Allergy <input type="checkbox"/> | Pregnancy Status: To be determined <input type="checkbox"/> | Lactation Status: To be determined <input type="checkbox"/> | Smoking Status: <input checked="" type="checkbox"/> Unknown       |                                                               |
| Given within past 5 years <input type="checkbox"/>         | Already given this season <input type="checkbox"/>             |                                                             |                                                             |                                                                   |                                                               |
|                                                            | History of Gulland-Barre Syndrome <input type="checkbox"/>     |                                                             |                                                             |                                                                   |                                                               |

| ASSESSMENT ORDERS                                                  | Dose | Route          | Frequency | SMOKING CESSATION ITEMS                                   | Start Date | Route   | Frequency |
|--------------------------------------------------------------------|------|----------------|-----------|-----------------------------------------------------------|------------|---------|-----------|
| <input type="checkbox"/> pneumococcal 23-valp vaccine...           | 0.5  | intraMUSCUL... | Once      | <input type="checkbox"/> nicotine 7 mg-24 hour topical -  | T          | topical | Daily     |
| <input type="checkbox"/> influenza vaccine injection -             | 0.5  | intraMUSCUL... | Once      | <input type="checkbox"/> nicotine 14 mg-24 hour topical - | T          | topical | Daily     |
| <input checked="" type="checkbox"/> R/O MRSA (Nasal Culture R/O... |      |                |           | <input type="checkbox"/> nicotine 21 mg-24 hour topical - | T          | topical | Daily     |
| <input type="checkbox"/> Smoking Cessation Counseling              |      |                |           |                                                           |            |         |           |

VENOUS THROMBOEMBOLISM RISK ASSESSMENT:

INDICATIONS FOR VENOUS THROMBOEMBOLISM PROPHYLAXIS:

Order venous thromboembolism (VTE) prophylaxis unless patient is at low risk (has none of the below risk factors):

- Age 40 years old or greater
- Recent surgery lasting 45 minutes or more
- History of venous thromboembolism
- History of hypercoagulability

OK Cancel

B

Admission Form - HUP [2 orders of 22 are selected]

- Epidural catheter  
 - Warfarin only  
 - Pregnancy

Combined Measurements:

| Height (inches)     | Height (cm) | Weight (lb)       | Weight (kg) | BSA  | BMI  |
|---------------------|-------------|-------------------|-------------|------|------|
| 67                  | 170.2       | 150               | 68          | 1.79 | 23.5 |
| Mar-19-2010 0:17:47 |             | Mar-24-2010 06:44 |             |      |      |

Creatinine Clearance (Estimated (Cockcroft-Gault))

| Creatinine (mg/dl)           | Creat Clear (est) | Actual | Estimated |
|------------------------------|-------------------|--------|-----------|
| 0.9                          | 57.1              |        |           |
| Resulted - Mar-24-2010 08:20 |                   |        |           |

Relevant Lab Results:

Prothrombin Time: 12.3(Mar20);  
 International Normalized Unit: 1.0(Mar20);  
 Creatinine, Serum: 0.90(Mar24);  
 Hemoglobin: 10.9(Mar24); Platelet Count (PLT): 156(Mar24);

I will order pharmacologic prophylaxis   
 I will order mechanical prophylaxis only   
 I will not order any VTE prophylaxis

SERVICE LIST:

|                                                 |                                                |                                                         |
|-------------------------------------------------|------------------------------------------------|---------------------------------------------------------|
| MEDICINE AND NEUROLOGY <input type="checkbox"/> | HIP FRACTURE SURGERY <input type="checkbox"/>  | TRAUMA AND SPINAL CORD INJURY <input type="checkbox"/>  |
| NEUROSURGERY <input type="checkbox"/>           | ACUTE ISCHEMIC STROKE <input type="checkbox"/> | TOTAL HIP AND KNEE SURGERY <input type="checkbox"/>     |
| VASCULAR SURGERY <input type="checkbox"/>       | ALL OTHER SURGERY <input type="checkbox"/>     | HEPARIN DOSES ABOVE 5000 units <input type="checkbox"/> |

| PHARMACOLOGIC AGENTS                            | Dose | Units   | Start Date | Route           | Frequency      | NON-PHARMACOLOGIC ORDERS                             | Start Date | Frequency | Additional Information        |
|-------------------------------------------------|------|---------|------------|-----------------|----------------|------------------------------------------------------|------------|-----------|-------------------------------|
| - HEPARIN - 4 item(s)                           |      |         |            |                 |                | - MECHANICAL PROPHYLAXIS - 2 item(s)                 |            |           |                               |
| <input type="checkbox"/> heparin injection -    | 5000 | Unit(s) | T          | subcutaneous    | Every 8 Hours  | <input type="checkbox"/> Intermittent Compression... | T          |           |                               |
| <input type="checkbox"/> heparin injection -    | 5000 | Unit(s) | T+1        | subcutaneous    | Every 8 Hours  | <input type="checkbox"/> Antithrombotic Stockings:   | T          |           |                               |
| <input type="checkbox"/> heparin injection -    | 5000 | Unit(s) | T          | subcutaneous    | Every 12 Hours | - PATIENT EDUCATION ORDERS - 1 item(s)               |            |           |                               |
| <input type="checkbox"/> heparin injection -    |      | Unit(s) | T          | Subcutaneous... |                | <input type="checkbox"/> Warfarin Education          |            |           | Patient needs education on... |
| - DALTEPARIN - 2 item(s)                        |      |         |            |                 |                | - LAB ORDERS - 2 item(s)                             |            |           |                               |
| <input type="checkbox"/> dalteparin injection - | 5000 | Unit(s) | T          | subcutaneous    | Daily @ 1800   | <input type="checkbox"/> CBC- w/out Diff (Heme...    | T+1        |           |                               |
| <input type="checkbox"/> dalteparin injection - | 5000 | Unit(s) | T          | subcutaneous    | Daily @ 1100   | <input checked="" type="checkbox"/> Prolite          | T+1        |           |                               |

OK Cancel
